# Supplementary material for: Identification of Stingless Bee Honey Adulteration Using Visible-Near Infrared Spectroscopy Combined with Aquaphotomics
Source: MDPI journal article supplement (doi:10.3390/molecules27072324), 2022-04-03
Supplement: s1 [file s1]

**CIE 1931**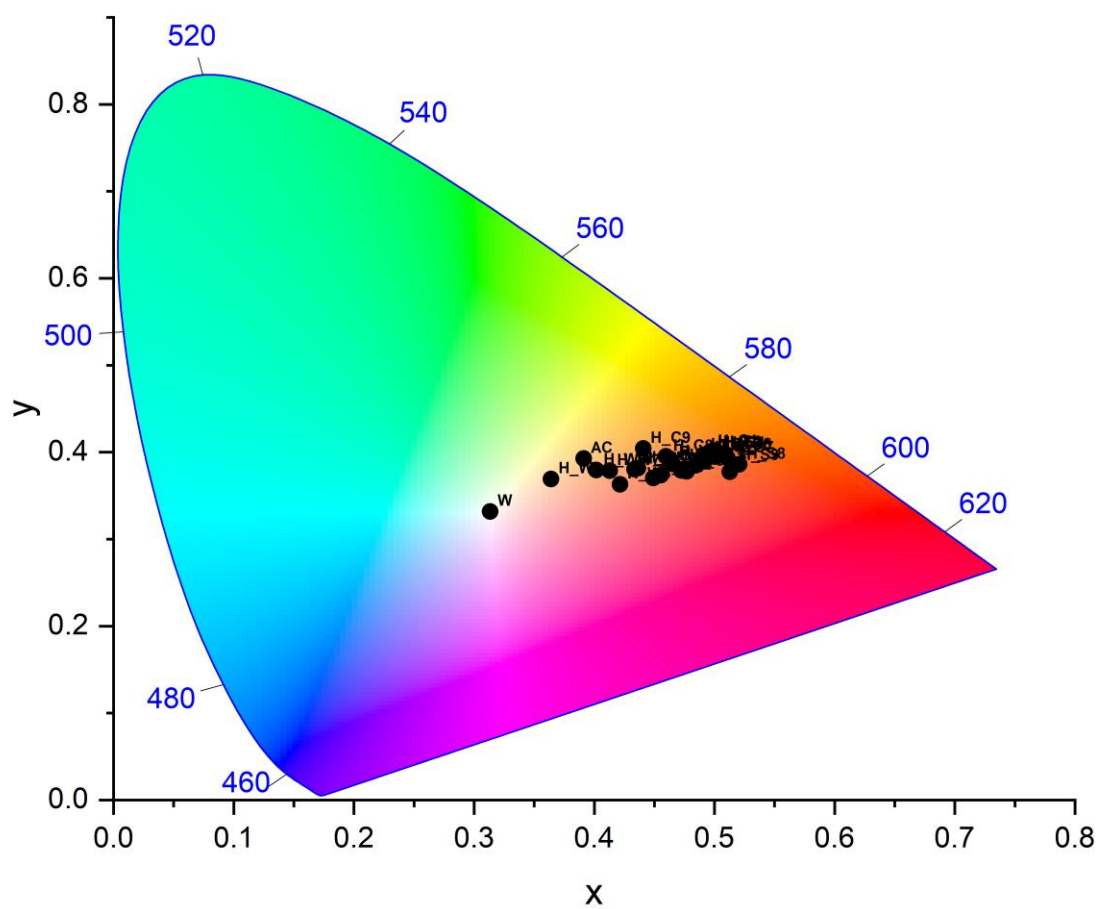

**Figure S1.** CIE x, y chromaticity diagram showing the variation of colour of the samples (n = 31).

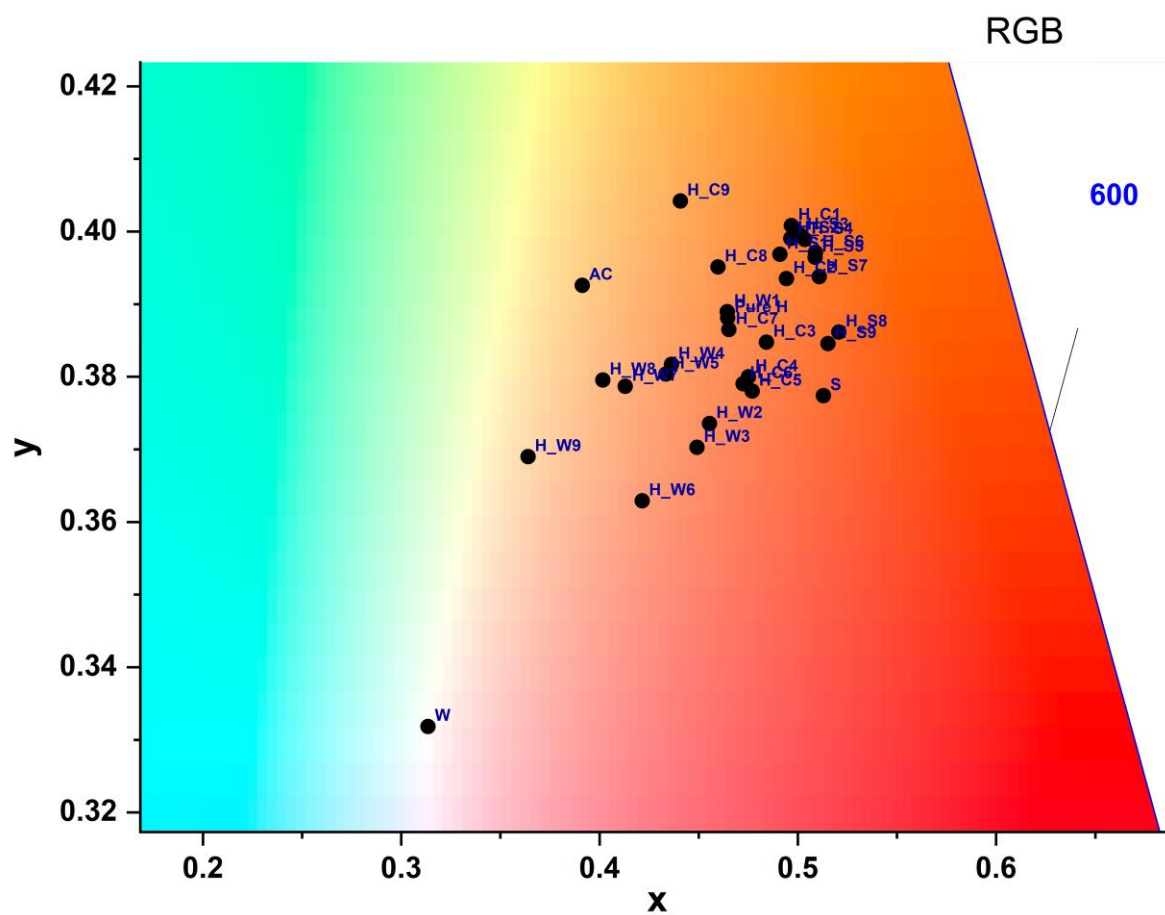

Figure S2. Zoom-in view of CIE x, y chromaticity diagram of the samples (n = 31).

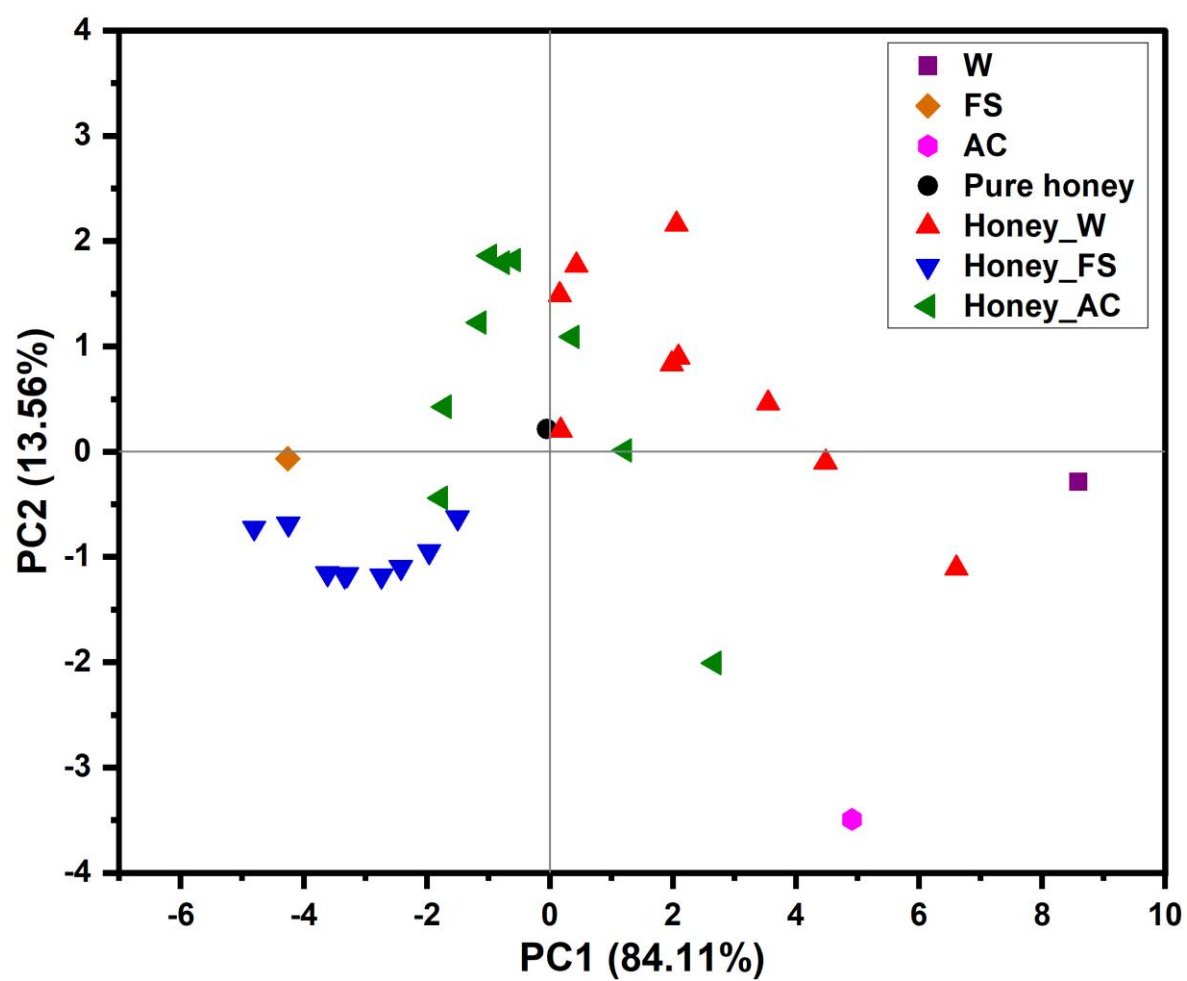

Figure S3. 2D scores plot of PC1 vs. PC2 of the samples (n = 31).

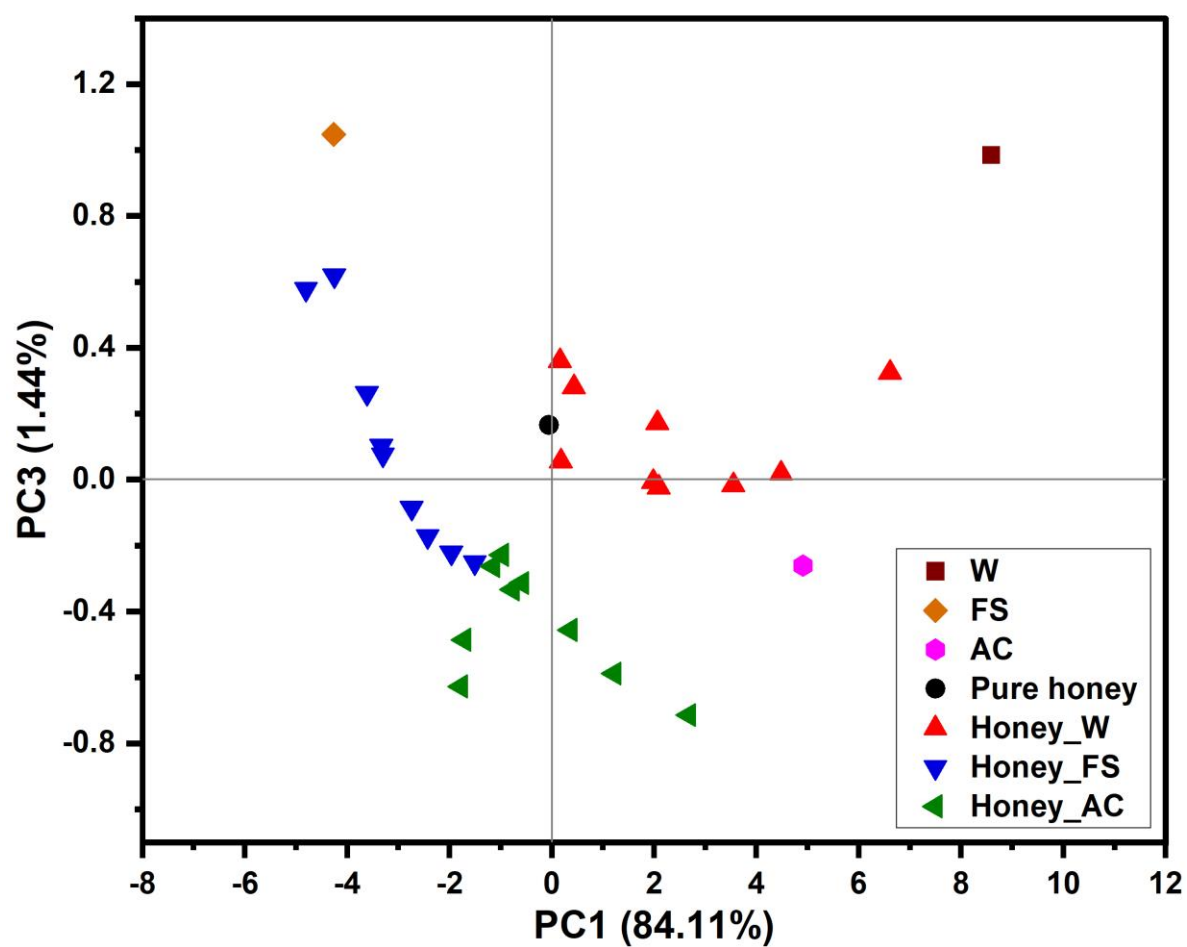

**Figure S4.** 2D scores plot of PC1 vs. PC3 of the samples (n = 31).

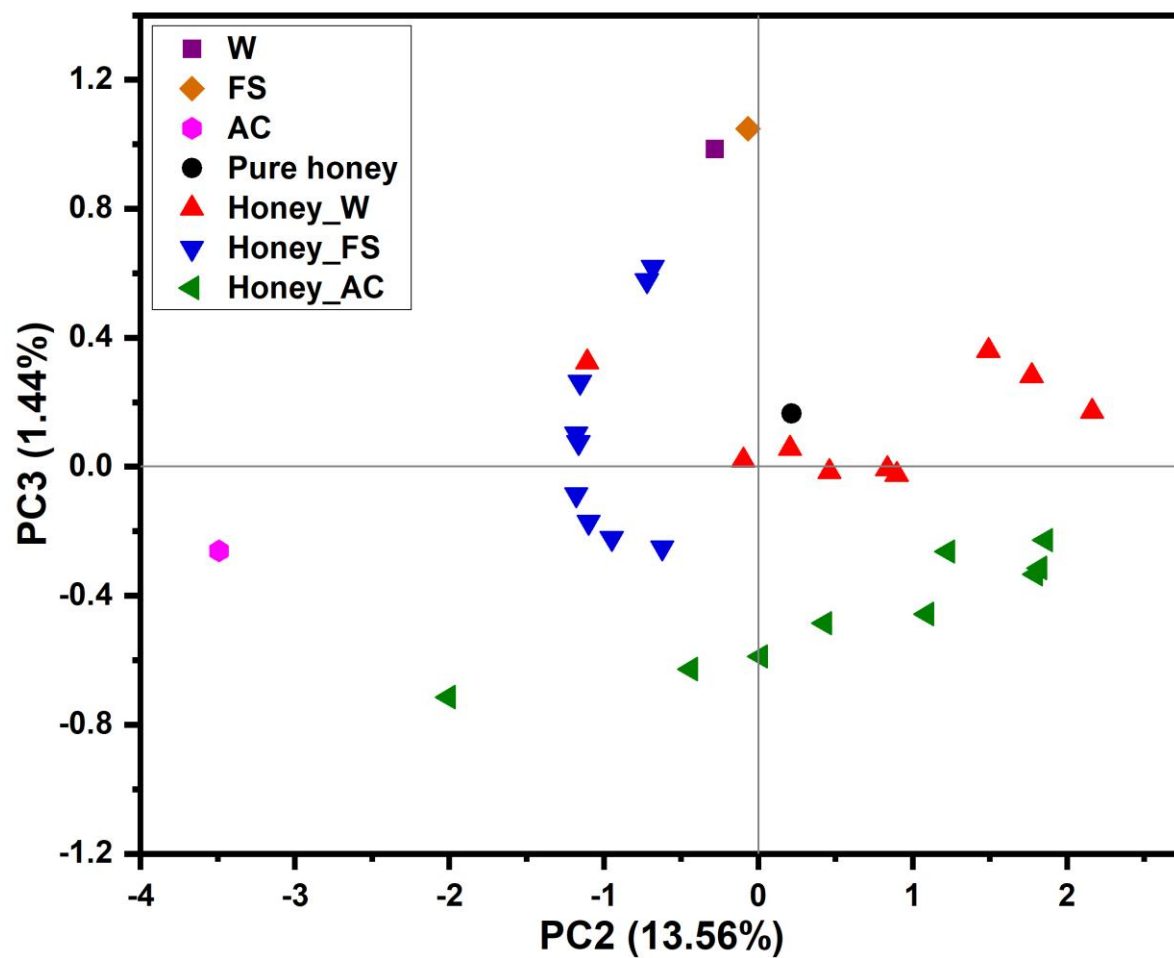

**Figure S5.** 2D scores plot of PC2 vs. PC3 of the samples (n = 31).
